# Supplementary material for: NAFLD and Atherosclerosis Are Prevented by a Natural Dietary Supplement Containing Curcumin, Silymarin, Guggul, Chlorogenic Acid and Inulin in Mice Fed a High-Fat Diet
Source: Nutrients. 2017 May 13;9(5):492. doi: 10.3390/nu9050492 (PMC5452222; doi:10.3390/nu9050492)
Supplement: Supplementary file 1 [file nutrients-09-00492-s001.xls]

## Sheet: Foglio1
Position	Unigene	GeneBank	Symbol	Description	Fold Change
A01	Mm.277376	NM_013454	Abca1	ATP-binding cassette, sub-family A (ABC1), member 1	-1.29269
A02	Mm.470747	NM_009593	Abcg1	ATP-binding cassette, sub-family G (WHITE), member 1	1.76087
A03	Mm.31374	NM_133360	Acaca	Acetyl-Coenzyme A carboxylase alpha	1.33004
A04	Mm.2445	NM_007381	Acadl	Acyl-Coenzyme A dehydrogenase, long-chain	1.79406
A05	Mm.282039	NM_134037	Acly	ATP citrate lyase	1.31986
A06	Mm.356689	NM_015729	Acox1	Acyl-Coenzyme A oxidase 1, palmitoyl	-1.16105
A07	Mm.292056	NM_027976	Acsl5	Acyl-CoA synthetase long-chain family member 5	1.3989
A08	Mm.334199	NM_016870	Acsm3	Acyl-CoA synthetase medium-chain family member 3	1.76124
A09	Mm.259976	NM_028320	Adipor1	Adiponectin receptor 1	-1.22907
A10	Mm.291826	NM_197985	Adipor2	Adiponectin receptor 2	1.32263
A11	Mm.6645	NM_009652	Akt1	Thymoma viral proto-oncogene 1	-1.12605
A12	Mm.26743	NM_009692	Apoa1	Apolipoprotein A-I	1.0323
B01	Mm.221239	NM_009693	Apob	Apolipoprotein B	1.0532
B02	Mm.390161	NM_023114	Apoc3	Apolipoprotein C-III	1.18672
B03	Mm.305152	NM_009696	Apoe	Apolipoprotein E	1.95398
B04	Mm.12677	NM_020615	Atp5c1	ATP synthase, H+ transporting, mitochondrial F1 complex, gamma polypeptide 1	1.28487
B05	Mm.34405	NM_009810	Casp3	Caspase 3	1.12824
B06	Mm.406799	NM_007643	Cd36	CD36 antigen	1.22735
B07	Mm.439656	NM_009883	Cebpb	CCAAT/enhancer binding protein (C/EBP), beta	1.44685
B08	Mm.290251	NM_013493	Cnbp	Cellular nucleic acid binding protein	1.32796
B09	Mm.18522	NM_013495	Cpt1a	Carnitine palmitoyltransferase 1a, liver	1.20356
B10	Mm.307620	NM_009949	Cpt2	Carnitine palmitoyltransferase 2	2.02835
B11	Mm.21758	NM_021282	Cyp2e1	Cytochrome P450, family 2, subfamily e, polypeptide 1	2.00725
B12	Mm.57029	NM_007824	Cyp7a1	Cytochrome P450, family 7, subfamily a, polypeptide 1	-2.30545
C01	Mm.491108	NM_026384	Dgat2	Diacylglycerol O-acyltransferase 2	1.17679
C02	Mm.22126	NM_017399	Fabp1	Fatty acid binding protein 1, liver	3.84902
C03	Mm.388886	NM_010174	Fabp3	Fatty acid binding protein 3, muscle and heart	1.49606
C04	Mm.741	NM_010634	Fabp5	Fatty acid binding protein 5, epidermal	-2.97134
C05	Mm.1626	NM_007987	Fas	Fas (TNF receptor superfamily member 6)	1.07761
C06	Mm.236443	NM_007988	Fasn	Fatty acid synthase	2.60013
C07	Mm.938	NM_010446	Foxa2	Forkhead box A2	1.44451
C08	Mm.18064	NM_008061	G6pc	Glucose-6-phosphatase, catalytic	2.19578
C09	Mm.27210	NM_008062	G6pdx	Glucose-6-phosphate dehydrogenase X-linked	-1.2189
C10	Mm.220358	NM_010292	Gck	Glucokinase	1.08014
C11	Mm.394930	NM_019827	Gsk3b	Glycogen synthase kinase 3 beta	1.27792
C12	Mm.246682	NM_008194	Gyk	Glycerol kinase	1.00087
D01	Mm.316652	NM_008255	Hmgcr	3-hydroxy-3-methylglutaryl-Coenzyme A reductase	2.29239
D02	Mm.202383	NM_008261	Hnf4a	Hepatic nuclear factor 4, alpha	1.21909
D03	Mm.240327	NM_008337	Ifng	Interferon gamma	4.73117
D04	Mm.268521	NM_010512	Igf1	Insulin-like growth factor 1	1.13265
D05	Mm.21300	NM_008341	Igfbp1	Insulin-like growth factor binding protein 1	1.52479
D06	Mm.874	NM_010548	Il10	Interleukin 10	1.16695
D07	Mm.222830	NM_008361	Il1b	Interleukin 1 beta	1.3685
D08	Mm.1019	NM_031168	Il6	Interleukin 6	-1.92234
D09	Mm.268003	NM_010568	Insr	Insulin receptor	-1.05341
D10	Mm.4952	NM_010570	Irs1	Insulin receptor substrate 1	1.53228
D11	Mm.3213	NM_010700	Ldlr	Low density lipoprotein receptor	1.24535
D12	Mm.259282	NM_010704	Lepr	Leptin receptor	1.37061
E01	Mm.1514	NM_008509	Lpl	Lipoprotein lipase	1.05148
E02	Mm.196581	NM_011949	Mapk1	Mitogen-activated protein kinase 1	-1.02585
E03	Mm.21495	NM_016700	Mapk8	Mitogen-activated protein kinase 8	1.60553
E04	Mm.34213	NM_021455	Mlxipl	MLX interacting protein-like	1.11367
E05	Mm.21158	NM_020009	Mtor	Mechanistic target of rapamycin (serine/threonine kinase)	-1.13527
E06	Mm.1103	NM_001033305	Ndufb6	NADH dehydrogenase (ubiquinone) 1 beta subcomplex, 6	1.7701
E07	Mm.256765	NM_008689	Nfkb1	Nuclear factor of kappa light polypeptide gene enhancer in B-cells 1, p105	1.1871
E08	Mm.968	NM_009473	Nr1h2	Nuclear receptor subfamily 1, group H, member 2	1.16615
E09	Mm.22690	NM_013839	Nr1h3	Nuclear receptor subfamily 1, group H, member 3	1.67519
E10	Mm.3095	NM_009108	Nr1h4	Nuclear receptor subfamily 1, group H, member 4	1.17487
E11	Mm.491140	NM_028994	Pck2	Phosphoenolpyruvate carboxykinase 2 (mitochondrial)	-1.35663
E12	Mm.235547	NM_013743	Pdk4	Pyruvate dehydrogenase kinase, isoenzyme 4	1.63457
F01	Mm.260521	NM_008839	Pik3ca	Phosphatidylinositol 3-kinase, catalytic, alpha polypeptide	1.10147
F02	Mm.259333	NM_001024955	Pik3r1	Phosphatidylinositol 3-kinase, regulatory subunit, polypeptide 1 (p85 alpha)	1.74831
F03	Mm.383180	NM_013631	Pklr	Pyruvate kinase liver and red blood cell	1.70415
F04	Mm.28897	NM_026438	Ppa1	Pyrophosphatase (inorganic) 1	1.18735
F05	Mm.212789	NM_011144	Ppara	Peroxisome proliferator activated receptor alpha	1.69604
F06	Mm.328914	NM_011145	Ppard	Peroxisome proliferator activator receptor delta	-1.0046
F07	Mm.3020	NM_011146	Pparg	Peroxisome proliferator activated receptor gamma	1.03413
F08	Mm.259072	NM_008904	Ppargc1a	Peroxisome proliferative activated receptor, gamma, coactivator 1 alpha	1.1001
F09	Mm.207004	NM_001013367	Prkaa1	Protein kinase, AMP-activated, alpha 1 catalytic subunit	-1.2381
F10	Mm.277916	NM_011201	Ptpn1	Protein tyrosine phosphatase, non-receptor type 1	1.13937
F11	Mm.2605	NM_011255	Rbp4	Retinol binding protein 4, plasma	1.06839
F12	Mm.24624	NM_011305	Rxra	Retinoid X receptor alpha	-1.01081
G01	Mm.267377	NM_009127	Scd1	Stearoyl-Coenzyme A desaturase 1	-2.82995
G02	Mm.250422	NM_008871	Serpine1	Serine (or cysteine) peptidase inhibitor, clade E, member 1	1.54921
G03	Mm.10984	NM_009512	Slc27a5	Solute carrier family 27 (fatty acid transporter), member 5	1.25907
G04	Mm.21002	NM_011400	Slc2a1	Solute carrier family 2 (facilitated glucose transporter), member 1	1.37269
G05	Mm.18443	NM_031197	Slc2a2	Solute carrier family 2 (facilitated glucose transporter), member 2	1.36359
G06	Mm.10661	NM_009204	Slc2a4	Solute carrier family 2 (facilitated glucose transporter), member 4	1.13573
G07	Mm.3468	NM_007707	Socs3	Suppressor of cytokine signaling 3	-8.29633
G08	Mm.278701	NM_011480	Srebf1	Sterol regulatory element binding transcription factor 1	1.85413
G09	Mm.38016	NM_033218	Srebf2	Sterol regulatory element binding factor 2	1.11893
G10	Mm.249934	NM_011486	Stat3	Signal transducer and activator of transcription 3	-1.43258
G11	Mm.1293	NM_013693	Tnf	Tumor necrosis factor	-1.25358
G12	Mm.469937	NM_013842	Xbp1	X-box binding protein 1	-1.44939
H01	Mm.391967	NM_007393	Actb	Actin, beta	1
H02	Mm.163	NM_009735	B2m	Beta-2 microglobulin	1
H03	Mm.304088	NM_008084	Gapdh	Glyceraldehyde-3-phosphate dehydrogenase	1
H04	Mm.3317	NM_010368	Gusb	Glucuronidase, beta	1
H05	Mm.2180	NM_008302	Hsp90ab1	Heat shock protein 90 alpha (cytosolic), class B member 1	1
H06	N/A	SA_00106	MGDC	Mouse Genomic DNA Contamination
H07	N/A	SA_00104	RTC	Reverse Transcription Control
H08	N/A	SA_00104	RTC	Reverse Transcription Control
H09	N/A	SA_00104	RTC	Reverse Transcription Control
H10	N/A	SA_00103	PPC	Positive PCR Control
H11	N/A	SA_00103	PPC	Positive PCR Control
H12	N/A	SA_00103	PPC	Positive PCR Control
